# Supplementary material
Source: PubMed Central journal article supplement (PMC5499685)
Supplement: NIHMS870487-supplement.pdf [file NIHMS870487-supplement.pdf]

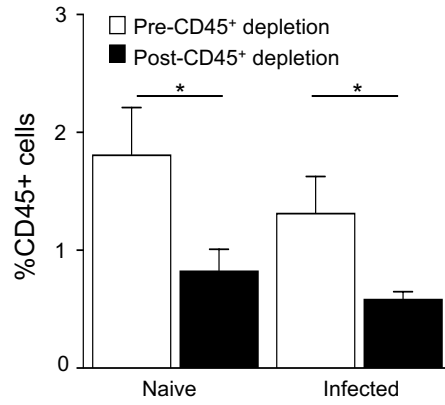

**Figure S1, related to Figure 1. Examination of leukocyte depletion.** %CD45<sup>+</sup> cells in IECs isolated from colon of wildtype mice prior to and following CD45<sup>+</sup> depletion. Infected mice were assessed at day 12 post gavage with *C. rodentium*. Results are shown as mean s.e.m. \*p<0.05.

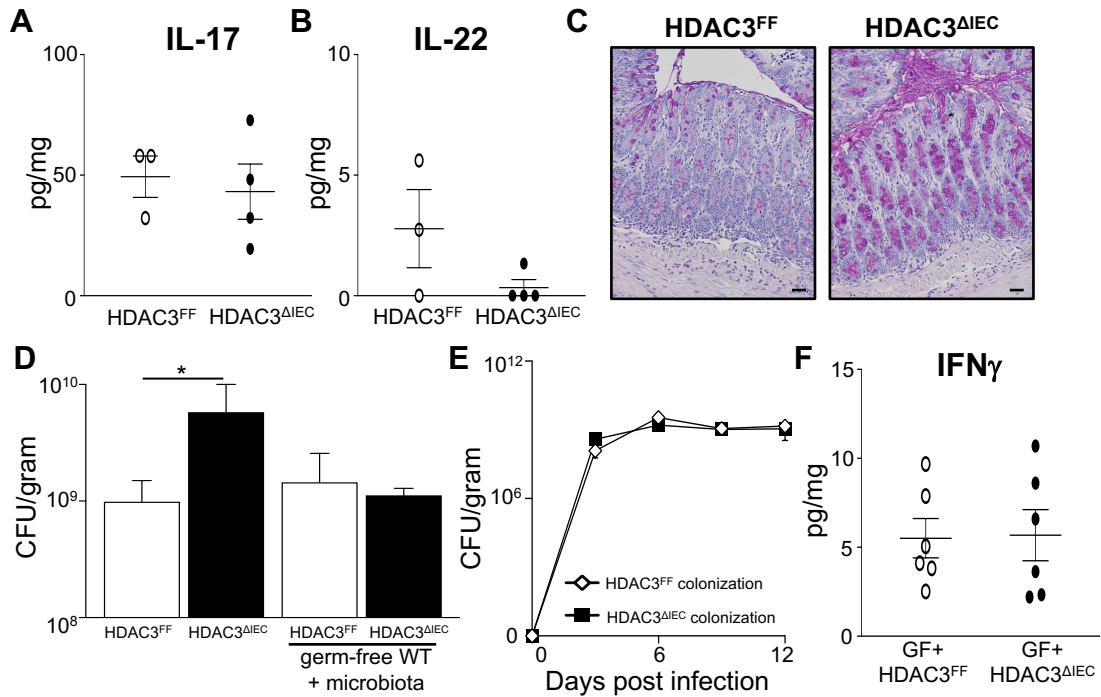

**Figure S2, related to Figure 2. Microbiota composition of HDAC3<sup>ΔIEC</sup> mice is not sufficient to impair defense against *C. rodentium*.** (A) IL-17 and (B) IL-22 in colonic tissue of HDAC3<sup>FF</sup> and HDAC3<sup>ΔIEC</sup> mice measured by ELISA. (C) PAS/Alcian blue stained sections from distal colon of *C. rodentium* infected HDAC3<sup>FF</sup> and HDAC3<sup>ΔIEC</sup> mice, scale bar 50 μm. (D) Enumeration of *C. rodentium* CFU in stool of HDAC3<sup>FF</sup>, HDAC3<sup>ΔIEC</sup>, and germ-free (GF) wildtype mice reconstituted with microbiota from HDAC3<sup>FF</sup> or HDAC3<sup>ΔIEC</sup> mice at day 12 post *C. rodentium* infection. (E) Timecourse of *C. rodentium* infection in reconstituted mice. (F) IFN $\gamma$  in colonic tissue of GF wildtype mice reconstituted with microbiota from HDAC3<sup>FF</sup> or HDAC3<sup>ΔIEC</sup> mice measured by ELISA. Data are at day 12 post infection and representative of at least 2 independent experiments containing 3-6 mice per group. Results are shown as mean  $\pm$  s.e.m.

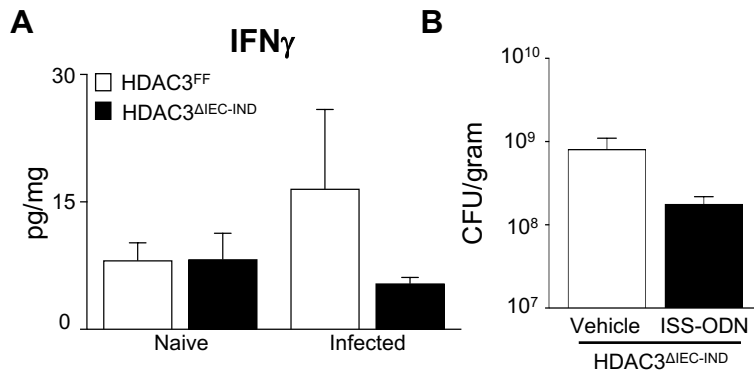

**Figure S3, related to Figure 3. IEC-intrinsic HDAC3 actively regulates susceptibility and IFN $\gamma$ -dependent defense against *C. rodentium*.** (A) IFN $\gamma$  in colonic tissue of HDAC3<sup>FF</sup> and HDAC3 $\Delta$ IEC-IND mice measured by ELISA. (B) Enumeration of *C. rodentium* CFU in stool of HDAC3<sup>IND- $\Delta$ IEC</sup> mice treated with PBS or ISS-ODN. Data are 5 days after tamoxifen administration was completed (12 d post infection) and representative of at least 2 independent experiments containing 3-6 mice per group. Results are shown as mean  $\pm$  s.e.m.

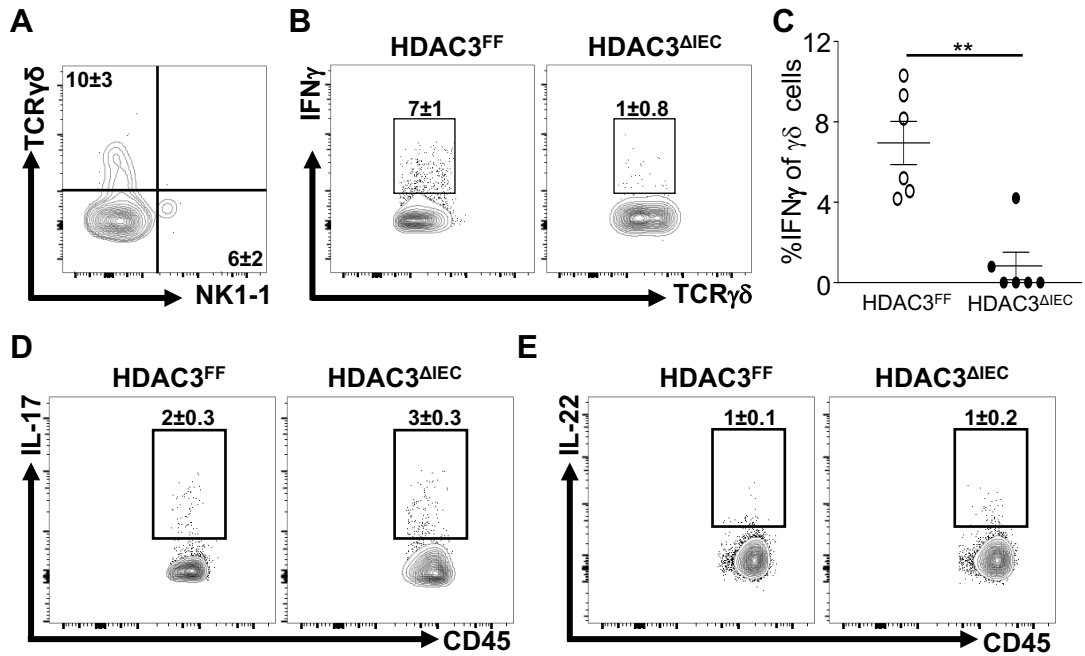

**Figure S4, related to Figures 4 and 5. Infection-induced IFN $\gamma$ -producing  $\gamma\delta$  intraepithelial lymphocytes are decreased in HDAC3 $\Delta$ IEC mice. (A) Characterization of IFN $\gamma$ -producing IELs from infected mice in (Fig. 4a) based on T cell receptor (TCR)  $\gamma\delta$  and NK1-1 staining. (B, C) %IFN $\gamma$ -producing  $\gamma\delta$  IELs. (D) %IL-17 and (E) %IL-22 producing CD45<sup>+</sup> IELs. Data are at day 6 post *C. rodentium* infection and representative of at least 2 independent experiments containing 3-4 mice per group. Results are shown as mean  $\pm$  s.e.m. \*\* $p$ <0.01.**

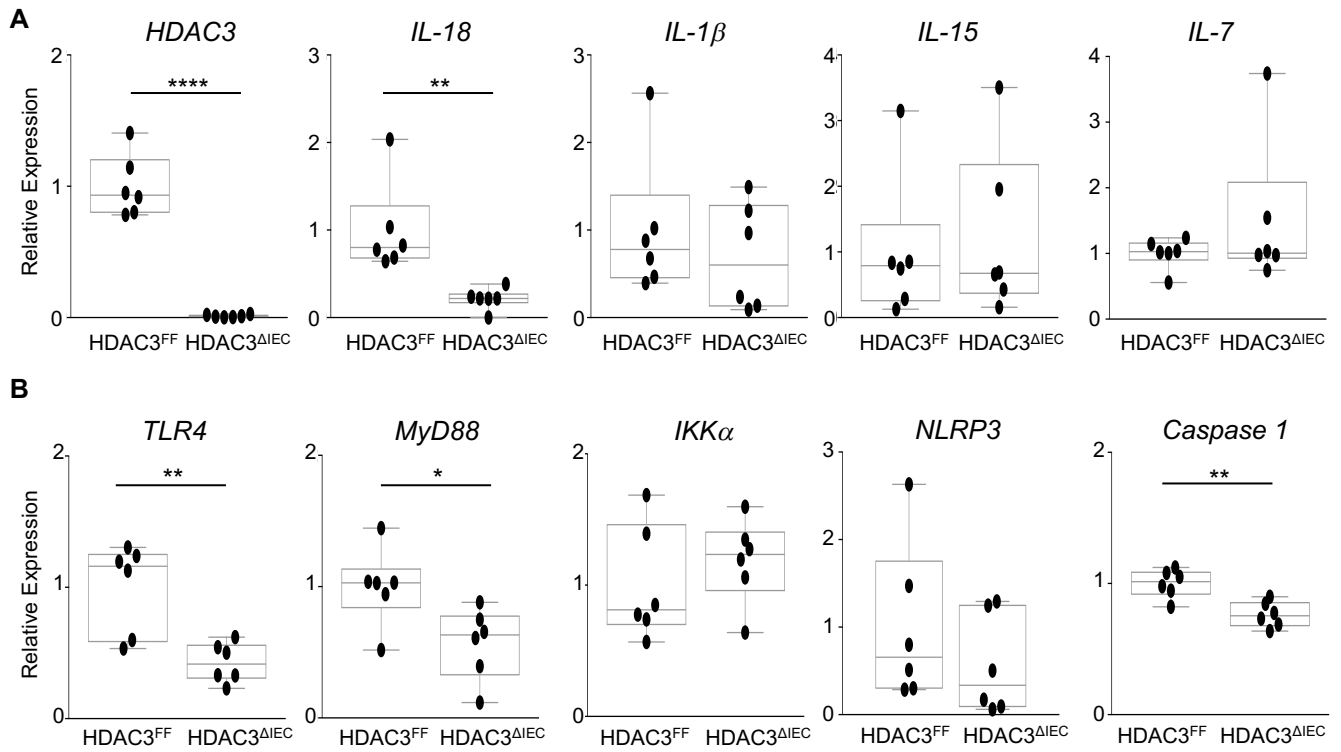

**Figure S5, related to Figure 7. mRNA expression in infected mice lacking IEC-intrinsic HDAC3 expression. (A, B)** mRNA expression in IECs from HDAC3<sup>FF</sup> and HDAC3 <sup>$\Delta$ IEC</sup> mice at day 6 post *C. rodentium* infection. Data are representative of at least 4 independent experiments containing 3-6 mice per group. Results are shown as mean  $\pm$  s.e.m. \* $p$ <0.05, \*\* $p$ <0.01.

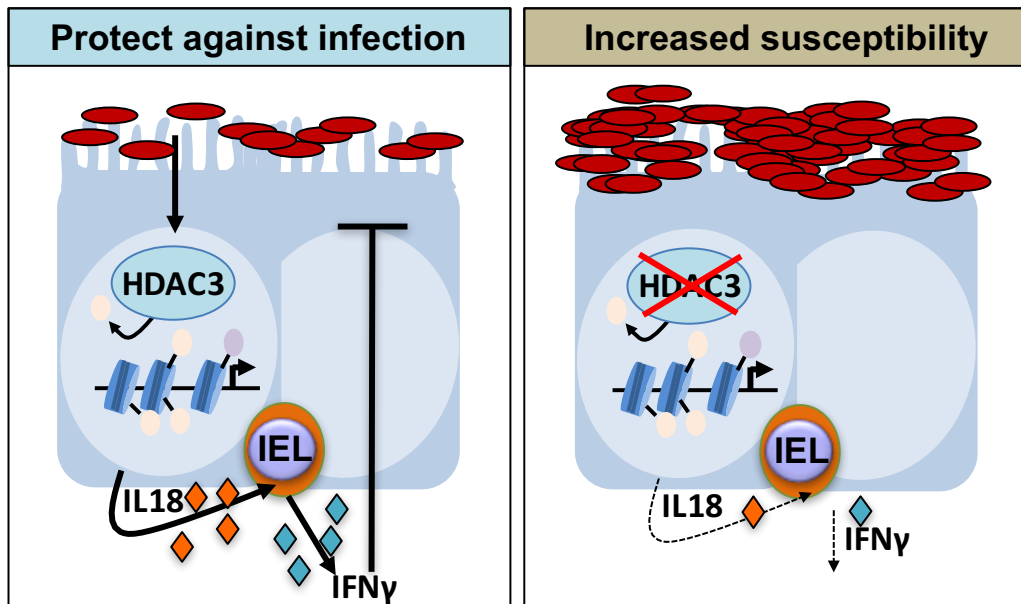

**Figure S6, related to Figures 1-7. An essential role for epithelial HDAC3 in instructing host defense against enteric infection.** IEC-intrinsic HDAC3 calibrates host susceptibility to mucosal infection by coordinating a protective IEL response against bacterial pathogens. Loss of epithelial HDAC3 regulation results in impairment of IFN $\gamma$  production by local IELs and increased infection.

|                 | Forward                   | Reverse                     |
|-----------------|---------------------------|-----------------------------|
| <b>HDAC3</b>    | TTGGTATCCTGGAGCTGCTT      | GACCCGGTCAGTGAGGTAGA        |
| <b>IL-18</b>    | CAGGCCTGACATCTTCTGCAA     | TCTGACATGGCAGCCATTGT        |
| <b>IL-1b</b>    | ACCTTCCAGGATGAGGACATGA    | CTAATGGGAACGTCACACACCA      |
| <b>IL-15</b>    | GTCAGTGTAGGTCTCCCTAAA     | TTCTCCTCCAGCTCCTCACAT       |
| <b>IL-7</b>     | AATCGTGCTGCTCGCAAGTT      | CACCAGTGTTTGTGTGCCTTGT      |
| <b>TLR-4</b>    | TGTTCTTCTCCTGCCTGACA      | TGTCATCAGGGACTTTGCTG        |
| <b>MyD88</b>    | CACCTGTGTCTGGTCCATTG      | CTGTTGGACACCTGGAGACA        |
| <b>IKKa</b>     | GACCGTGAACATCCTCTGACATGTG | GCTCTGGTCCTCATTGCTTCACG     |
| <b>NLRP3</b>    | CGAGACCTCTGGGAAAAAGCT     | GCATACCATAGAGGAATGTGATGTACA |
| <b>Caspase1</b> | ATCTTTCTCCGAGGGTTGG       | AAGTCTTGTGCTCTGGGCAG        |

**Table S1, related to Experimental Procedures. Primer sequences for quantitative PCR.**
